# Supplementary material for: Preseason shoulder range of motion screening and in-season risk of shoulder and elbow injuries in overhead athletes: systematic review and meta-analysis
Source: PubMed Central journal article supplement (PMC7456673; doi:10.1136/bjsports-2019-100698), 2020-01-14
Supplement: bjsports-2019-100698supp001.pdf [file bjsports-2019-100698supp001.pdf]

**Appendix A.** Search terms used to query PubMed and Cochrane Library databases.**PubMed**

1. "Mass Screening" [Mesh]
2. prevention and control [Subheading]
3. "Risk Factors" [Mesh]
4. Screening
5. Risk
6. Incidence
7. Risk Factors
- 8. 1-7/OR**
9. "Athletic Injuries" [Mesh]
10. sport injury
11. sports injuries
12. sports injury
13. athletic injury
14. athletics injuries
- 15. 9-14/OR**
16. "Upper Extremity" [Mesh]
17. Arm
18. Upper extremity
19. elbow
20. forearm
21. shoulder
- 22. 16-21/OR**
- 23. 8 AND 15 AND 22**

**Cochrane**

1. MeSH descriptor: [Mass Screening] explode all trees
2. Any MeSH descriptor with qualifier(s): [Prevention & control - PC]
3. screening:ti,ab,kw (Word variations have been searched)
4. MeSH descriptor: [Risk Factors] explode all trees
5. risk:ti,ab,kw (Word variations have been searched)
6. incidence:ti,ab,kw (Word variations have been searched)
7. risk factors:ti,ab,kw (Word variations have been searched)
- 8. 1-7/OR**
9. MeSH descriptor: [Athletic Injuries] explode all trees
10. sport injury:ti,ab,kw (Word variations have been searched)
11. sports injuries:ti,ab,kw (Word variations have been searched)
12. sports injury:ti,ab,kw (Word variations have been searched)
13. athletic injury:ti,ab,kw (Word variations have been searched)
14. athletics injuries:ti,ab,kw (Word variations have been searched)
- 15. 8-14/OR**
16. MeSH descriptor: [Upper Extremity] explode all trees
17. Arm:ti,ab,kw (Word variations have been searched)
18. Upper extremity:ti,ab,kw (Word variations have been searched)
19. elbow:ti,ab,kw (Word variations have been searched)
20. forearm:ti,ab,kw (Word variations have been searched)
21. shoulder:ti,ab,kw (Word variations have been searched)
- 22. 16-21/OR**
- 23. 8 AND 15 AND 22**
