# Supplementary material for: Preseason shoulder range of motion screening and in-season risk of shoulder and elbow injuries in overhead athletes: systematic review and meta-analysis
Source: PubMed Central journal article supplement (PMC7456673; doi:10.1136/bjsports-2019-100698), 2020-01-14
Supplement: bjsports-2019-100698supp002.pdf [file bjsports-2019-100698supp002.pdf]

**Appendix B.** Critical appraisal of the included studies using the modified version of the Downs and Black checklist.

| Study Author                   | Questions |   |   |                |   |   |   |                |                   |    |                    |    |                          |    |                    |                 |    |    |                                    |    |                 | Raw score <sup>b</sup> | Percent score <sup>c</sup> |             |    |                    |    |    |                 |                  |                  |                   |                    |
|--------------------------------|-----------|---|---|----------------|---|---|---|----------------|-------------------|----|--------------------|----|--------------------------|----|--------------------|-----------------|----|----|------------------------------------|----|-----------------|------------------------|----------------------------|-------------|----|--------------------|----|----|-----------------|------------------|------------------|-------------------|--------------------|
|                                | Reporting |   |   |                |   |   |   |                | External validity |    |                    |    | Internal validity - bias |    |                    |                 |    |    | Internal validity - selection bias |    |                 |                        |                            | Power<br>27 |    |                    |    |    |                 |                  |                  |                   |                    |
|                                | 1         | 2 | 3 | 4 <sup>a</sup> | 5 | 6 | 7 | 8 <sup>a</sup> | 9                 | 10 | TOTAL <sup>b</sup> | 11 | 12                       | 13 | TOTAL <sup>b</sup> | 14 <sup>a</sup> | 15 | 16 | 17                                 | 18 | 19 <sup>a</sup> |                        |                            |             | 20 | TOTAL <sup>b</sup> | 21 | 22 | 23 <sup>a</sup> | 24 <sup>a</sup>  | 25               | 26                | TOTAL <sup>b</sup> |
| Anderson S, 2017               | 1         | 1 | 1 |                | 1 | 1 | 1 |                | 0                 | 1  | 7                  | 1  | 1                        | 1  | 3                  |                 | 0  | 0  | 1                                  | 1  |                 | 0                      | 2                          | 1           | 1  |                    |    | 1  | 1               | 4                | 0                | 16                | 76                 |
| Camp C, 2017                   | 1         | 1 | 1 |                | 1 | 1 | 1 |                | 1                 | 1  | 8                  | 0  | 0                        | 1  | 1                  |                 | 0  | 1  | 1                                  | 1  |                 | 0                      | 3                          | 1           | 1  |                    |    | 1  | 1               | 4                | 0                | 16                | 76                 |
| Clarsen B, 2014                | 1         | 1 | 1 |                | 0 | 1 | 1 |                | 0                 | 1  | 6                  | 1  | 1                        | 1  | 3                  |                 | 0  | 1  | 1                                  | 1  |                 | 1                      | 4                          | 1           | 1  |                    |    | 1  | 1               | 4                | 0                | 17                | 81                 |
| Forthomme B, 2013              | 1         | 1 | 1 |                | 0 | 1 | 1 |                | 0                 | 1  | 6                  | 1  | 0                        | 1  | 2                  |                 | 0  | 1  | 1                                  | 1  |                 | 1                      | 4                          | 1           | 1  |                    |    | 0  | 0               | 2                | 0                | 14                | 67                 |
| Hjelm N, 2012                  | 1         | 1 | 1 |                | 0 | 1 | 1 |                | 0                 | 1  | 6                  | 0  | 1                        | 1  | 2                  |                 | 0  | 1  | 1                                  | 1  |                 | 1                      | 4                          | 1           | 1  |                    |    | 0  | 1               | 3                | 0                | 15                | 71                 |
| Oyama S, 2017                  | 1         | 1 | 0 |                | 1 | 1 | 1 |                | 0                 | 1  | 6                  | 1  | 0                        | 1  | 2                  |                 | 0  | 1  | 1                                  | 1  |                 | 1                      | 4                          | 1           | 1  |                    |    | 0  | 0               | 2                | 0                | 14                | 67                 |
| Sakata J, 2017                 | 1         | 1 | 1 |                | 1 | 1 | 1 |                | 1                 | 1  | 8                  | 1  | 1                        | 1  | 3                  |                 | 0  | 1  | 1                                  | 1  |                 | 0                      | 3                          | 1           | 1  |                    |    | 0  | 1               | 3                | 1                | 18                | 86                 |
| Shanley E, 2015                | 1         | 1 | 1 |                | 0 | 1 | 1 |                | 0                 | 1  | 6                  | 1  | 0                        | 1  | 2                  |                 | 1  | 1  | 1                                  | 1  |                 | 1                      | 5                          | 1           | 1  |                    |    | 0  | 0               | 2                | 0                | 15                | 71                 |
| Shanley E, 2011                | 1         | 1 | 1 |                | 0 | 1 | 1 |                | 0                 | 1  | 6                  | 1  | 0                        | 1  | 2                  |                 | 1  | 1  | 1                                  | 1  |                 | 1                      | 5                          | 1           | 1  |                    |    | 0  | 0               | 2                | 0                | 15                | 71                 |
| Shitara E, 2011                | 1         | 1 | 1 |                | 0 | 1 | 1 |                | 0                 | 1  | 6                  | 1  | 1                        | 1  | 3                  |                 | 1  | 1  | 1                                  | 1  |                 | 1                      | 5                          | 1           | 1  |                    |    | 0  | 1               | 3                | 1                | 18                | 86                 |
| Tyler TF, 2014                 | 1         | 1 | 0 |                | 0 | 1 | 1 |                | 0                 | 1  | 5                  | 1  | 0                        | 1  | 2                  |                 | 0  | 0  | 1                                  | 1  |                 | 0                      | 2                          | 1           | 1  |                    |    | 0  | 0               | 2                | 0                | 11                | 52                 |
| Walker H, 2012                 | 1         | 1 | 1 |                | 0 | 1 | 1 |                | 1                 | 1  | 7                  | 1  | 0                        | 1  | 2                  |                 | 0  | 1  | 1                                  | 1  |                 | 1                      | 4                          | 1           | 1  |                    |    | 1  | 1               | 4                | 0                | 17                | 81                 |
| Wilk KE, 2014                  | 1         | 1 | 0 |                | 0 | 1 | 1 |                | 0                 | 1  | 5                  | 0  | 0                        | 1  | 1                  |                 | 0  | 1  | 1                                  | 1  |                 | 1                      | 4                          | 1           | 1  |                    |    | 0  | 0               | 2                | 0                | 12                | 57                 |
| Wilk KE, 2015                  | 1         | 1 | 0 |                | 0 | 1 | 1 |                | 0                 | 1  | 5                  | 0  | 0                        | 1  | 1                  |                 | 0  | 1  | 1                                  | 1  |                 | 1                      | 4                          | 1           | 1  |                    |    | 1  | 0               | 3                | 0                | 13                | 62                 |
| Wilk KE, 2011                  | 1         | 1 | 1 |                | 0 | 1 | 1 |                | 0                 | 1  | 6                  | 0  | 0                        | 1  | 1                  |                 | 0  | 1  | 1                                  | 1  |                 | 1                      | 4                          | 1           | 1  |                    |    | 0  | 0               | 2                | 0                | 13                | 62                 |
| <b>AVERAGE ± St. deviation</b> |           |   |   |                |   |   |   |                |                   |    | <b>6.2 ± 0.9</b>   |    |                          |    | <b>2.0 ± 0.8</b>   |                 |    |    |                                    |    |                 | <b>3.8 ± 0.9</b>       |                            |             |    |                    |    |    |                 | <b>2.8 ± 0.9</b> | <b>0.1 ± 0.4</b> | <b>15.9 ± 2.1</b> | <b>71.1 ± 10.1</b> |

<sup>a</sup>, Question not applicable to prospective cohort design.<sup>b</sup>, Total possible points: reporting, 8; external validity, 3; internal validity - bias, 5; internal validity - selection bias, 4; raw score, 21.<sup>c</sup>, Calculated as: (raw score/ 21 possible points)\*100
